# Supplementary material for: What to do with polyurethane waste? The environmental potential of chemically recycling polyurethane rigid foam
Source: Royal Society of Chemistry journal article supplement (doi:10.1039/d4gc02594f), 2024-01-01
Supplement: d4gc02594f1.pdf [file d4gc02594f1.pdf]

## Supplementary Information

***What to do with Polyurethane waste? -***

***The environmental potential***

***of chemically recycling Polyurethane rigid foam***

***Martin Pillich<sup>a</sup>, Johannes Schilling<sup>a</sup>, Luca Bosetti<sup>a</sup>, André Bardow<sup>a</sup>***

<sup>a</sup> *Energy & Process Systems Engineering, ETH Zurich, Zurich, Switzerland*

### **Corresponding author**

Prof. Dr.-Ing. André Bardow

Energy & Process Systems Engineering

ETH Zürich

Tannenstrasse 3

8092 Zürich

E-Mail: [abardow@ethz.ch](mailto:abardow@ethz.ch)

## Content

|    |                                                                                 |   |
|----|---------------------------------------------------------------------------------|---|
| S1 | Calculating the composition of PUR rigid foam .....                             | 3 |
| S2 | Calculating mass flows of recycling products .....                              | 3 |
| S3 | Calculating mass flows and composition of residuals.....                        | 4 |
| S4 | Datasets used from LCA databases.....                                           | 6 |
| S5 | Results for biomass fired cement kilns .....                                    | 7 |
| S6 | Calculating the minimum conversion rate.....                                    | 8 |
| S7 | Changes in heating value of residuals wastes due to lower conversion rates..... | 9 |

## S1 Calculating the composition of PUR rigid foam

Table S1: Considered ratio of precursor for production of PUR rigid foam according to patent from Covestro.<sup>1</sup>

| Precursor                       | weight-% |
|---------------------------------|----------|
| Polyol with hydroxyl number 450 | 30.1     |
| Polyol with hydroxyl number 400 | 8.6      |
| Polyol with hydroxyl number 112 | 2.58     |
| Catalyst                        | 0.86     |
| Stabilizer                      | 0.86     |
| Isocyanate                      | 57       |

We calculate the amount of polyol and isocyanate required for the PUR rigid foam analyzed in this study based on the precursor compositions in Table S1. We group all polyol precursors into one type of polyol (PPG-400), assume one type of Isocyanate (MDI) and neglect the catalyst and stabilizer in the overall composition. Those assumptions lead to the following compositions for 1kg of PUR rigid foam:

$$\text{Polyol: } m_{\text{Polyol}} = \frac{(301 + 86 + 25.8)\text{g}_{\text{Polyol}}}{(301 + 86 + 25.8 + 570)\text{kg}_{\text{PUR}}} = 420 \frac{\text{g}_{\text{Polyol}}}{\text{kg}_{\text{PUR}}}$$

$$\text{Isocyanate: } m_{\text{Isocyanate}} = \frac{570\text{g}_{\text{MDI}}}{(301 + 86 + 25.8 + 570)\text{kg}_{\text{PUR}}} = 580 \frac{\text{g}_{\text{MDI}}}{\text{kg}_{\text{PUR}}}$$

## S2 Calculating mass flows of recycling products

We calculate the mass flows of the recycling products according to the composition calculated in Section S1 and the molecular structure:

$$\text{MDA: } m_{\text{MDA}} = 580 \frac{\text{g}_{\text{MDI}}}{\text{kg}_{\text{PUR}}} * \frac{1}{250.25} \frac{\text{mol}_{\text{MDI}}}{\text{g}_{\text{MDI}}} * 1 \frac{\text{mol}_{\text{MDA}}}{\text{mol}_{\text{MDI}}} * 198.27 \frac{\text{g}_{\text{MDA}}}{\text{mol}_{\text{MDA}}} = 460 \frac{\text{g}_{\text{MDA}}}{\text{kg}_{\text{PUR}}}$$

$$\text{Aniline: } m_{\text{aniline}} = 460 \frac{\text{g}_{\text{MDA}}}{\text{kg}_{\text{PUR}}} * \frac{1}{198.27} \frac{\text{mol}_{\text{MDA}}}{\text{g}_{\text{MDA}}} * 2 \frac{\text{mol}_{\text{aniline}}}{\text{mol}_{\text{MDA}}} * 93.13 \frac{\text{g}_{\text{aniline}}}{\text{mol}_{\text{aniline}}} = 431 \frac{\text{g}_{\text{aniline}}}{\text{kg}_{\text{PUR}}}$$

$$\text{Benzene: } m_{\text{benzene}} = 431 \frac{\text{g}_{\text{aniline}}}{\text{kg}_{\text{PUR}}} * \frac{1}{93.13} \frac{\text{mol}_{\text{aniline}}}{\text{g}_{\text{aniline}}} * 1 \frac{\text{mol}_{\text{benzene}}}{\text{mol}_{\text{aniline}}} * 78.1 \frac{\text{g}_{\text{benzene}}}{\text{mol}_{\text{benzene}}} = 363 \frac{\text{g}_{\text{benzene}}}{\text{kg}_{\text{PUR}}}$$

### S3 Calculating mass flows and composition of residuals

We calculate the mass flows and the composition of the residuals based on elemental mass balances for carbon (C), hydrogen (H), nitrogen (N), and oxygen (O):

$$m_{i,\text{Residuals}} = m_{i,\text{PUR}} - m_{i,\text{RecyclingProduct}} \quad \forall i \in [\text{C, H, N, O}]$$

$$m_{\text{total,Residuals}} = \sum_i m_{i,\text{Residuals}},$$

Table S2 shows the resulting elemental composition and total mass flows for the residual waste per recycling option.

Table S2: Residual mass flows and composition per kg PUR treated with the respective recycling option

| Option                         | $m_{\text{C}}$ | $m_{\text{H}}$ | $m_{\text{N}}$ | $m_{\text{O}}$ | $m_{\text{total}} = \sum m_i$ |
|--------------------------------|----------------|----------------|----------------|----------------|-------------------------------|
| 1. Residuals of MDI + Polyol   | 0g             | 0g             | 0g             | 0g             | 0g                            |
| 2. Residuals of Polyol         | 414g           | 25g            | 62g            | 78g            | 580g                          |
| 3. Residuals of MDI            | 245g           | 45g            | 0g             | 130g           | 420g                          |
| 4. Residuals of MDA            | 301g           | 35g            | 0g             | 204g           | 540g                          |
| 5. Residuals of aniline        | 330g           | 35g            | 0g             | 204g           | 569g                          |
| 6. Residuals of benzene        | 330g           | 41g            | 62g            | 204g           | 637g                          |
| 7. Residuals of patent mixture | 398g           | 44g            | 14g            | 204g           | 660g                          |

The elemental masses  $m_{i,\text{PUR}}$  are based on the composition of the PUR rigid foam calculated in Section S1 and the elemental compositions of MDI and polyol. The elemental composition of MDI is given by the chemical formula of MDI which is  $\text{C}_{15}\text{H}_{10}\text{N}_2\text{O}_2$ .

As the polyol, PPG-400, is a mixture of multiple polypropylene glycols (PPG) with varying molecular weight (which average  $400 \frac{\text{g}}{\text{mol}}$  in the mixture), we assume the elemental composition of the polyol based on a mixture of two pure PPGs with 6 respectively 7 repeating units (see molecular structure of polyol in Figure 1): One has a molecular weight of  $366.56 \frac{\text{g}}{\text{mol}}$  and the chemical formula  $\text{C}_{18}\text{H}_{38}\text{O}_7$  and the other one has a molecular weight of  $424.64 \frac{\text{g}}{\text{mol}}$  and the chemical formula  $\text{C}_{21}\text{H}_{44}\text{O}_8$ .

Accordingly, the elemental masses of the recovered recycling products  $m_{i,\text{RecyclingProduct}}$  are based on the mass flow calculations in Section S2 and the chemical formulas of MDA ( $\text{C}_{13}\text{H}_{14}\text{N}_2$ ), aniline ( $\text{C}_6\text{H}_7\text{N}$ ), benzene ( $\text{C}_6\text{H}_6$ ) and p-toluidine ( $\text{C}_7\text{H}_9\text{N}$ )

## S4 Datasets used from LCA databases

Table S3: Sources of LCA datasets used in the study.

| process                                                               | Location | Source                          |
|-----------------------------------------------------------------------|----------|---------------------------------|
| market group for heat, central or small-scale, natural gas            | RER      |                                 |
| miscanthus production                                                 | DE       |                                 |
| market for lignite                                                    | RER      |                                 |
| market group for electricity, medium voltage                          | RER      | Ecoinvent 3.8 <sup>2</sup>      |
| market group for heat, central or small-scale, other than natural gas | RER      |                                 |
| treatment of waste polyurethane, sanitary landfill                    | RoW      |                                 |
| aniline                                                               | EU-27    |                                 |
| polypropylene glycol (PPG 400)                                        | EU-27    |                                 |
| benzene                                                               | EU-27    |                                 |
| methylene diphenyl diisocyanate                                       | EU-27    | cm.chemicals v1.01 <sup>3</sup> |
| p-toluidine                                                           | EU-27    |                                 |
| acetone                                                               | EU-27    |                                 |
| 4,4'-methylenedianiline                                               | EU-27    |                                 |

## S5 Results for biomass-fired cement kilns

| Chemical Recycling options | Impact Category from EF 3.0 | climate change in kg CO <sub>2</sub> -eq. | ozone depletion in kg CFC-11-eq. | human toxicity - carcinogenic in CTUh | human toxicity - non-carcinogenic in CTUh | particulate matter formation in disease incidences | ionising radiation - human health in kBq U-235-eq. | photochemical ozone formation in kg NMVOC-eq. | acidification in mol H <sup>+</sup> -eq. | eutrophication - terrestrial in mol N-eq. | eutrophication - freshwater in kg P-eq. | eutrophication - marine in kg N-eq. | ecotoxicity - freshwater in pt | land use in CTUe | water use in m <sup>3</sup> water-eq of deprived water | material resources - metals/minerals in kg Sb-eq. | energy resources - non-renewable in MJ |
|----------------------------|-----------------------------|-------------------------------------------|----------------------------------|---------------------------------------|-------------------------------------------|----------------------------------------------------|----------------------------------------------------|-----------------------------------------------|------------------------------------------|-------------------------------------------|-----------------------------------------|-------------------------------------|--------------------------------|------------------|--------------------------------------------------------|---------------------------------------------------|----------------------------------------|
|                            | Scale                       | x10 <sup>0</sup>                          | x10 <sup>-7</sup>                | x10 <sup>-10</sup>                    | x10 <sup>-8</sup>                         | x10 <sup>-8</sup>                                  | x10 <sup>-2</sup>                                  | x10 <sup>-3</sup>                             | x10 <sup>-3</sup>                        | x10 <sup>-2</sup>                         | x10 <sup>-4</sup>                       | x10 <sup>-3</sup>                   | x10 <sup>1</sup>               | x10 <sup>0</sup> | x10 <sup>1</sup>                                       | x10 <sup>-6</sup>                                 | x10 <sup>1</sup>                       |
| Cement Kiln                | MDI + PPG                   | 6.6                                       | 9.4                              | 9.7                                   | 5.4                                       | 9.3                                                | 51.9                                               | 11.1                                          | 17.7                                     | 4.6                                       | 176.8                                   | 4.2                                 | 15.2                           | -29.8            | 12.0                                                   | 13.5                                              | 8.5                                    |
|                            | PPG                         | 3.3                                       | 4.5                              | 3.1                                   | 5.6                                       | 5.5                                                | 34.1                                               | 4.4                                           | 8.3                                      | 1.0                                       | 82.9                                    | 0.8                                 | 11.0                           | -40.4            | 6.5                                                    | 3.9                                               | 4.4                                    |
|                            | MDI                         | 4.2                                       | 5.4                              | 5.5                                   | 4.1                                       | 6.6                                                | 35.6                                               | 8.3                                           | 12.5                                     | 3.6                                       | 124.6                                   | 3.2                                 | 3.9                            | -33.5            | 6.6                                                    | 9.3                                               | 5.4                                    |
|                            | MDA                         | 3.6                                       | 4.8                              | 5.4                                   | 3.0                                       | 6.0                                                | 20.8                                               | 7.9                                           | 11.8                                     | 3.6                                       | 118.0                                   | 2.9                                 | 0.8                            | -41.4            | 3.8                                                    | 4.6                                               | 4.4                                    |
|                            | Aniline                     | 3.1                                       | 4.3                              | 1.8                                   | 2.7                                       | 4.2                                                | 18.9                                               | 6.2                                           | 9.3                                      | 3.1                                       | 93.4                                    | 2.4                                 | 0.3                            | -41.0            | 3.2                                                    | 4.2                                               | 3.7                                    |
|                            | Benzene                     | 2.1                                       | 3.4                              | -0.1                                  | 2.6                                       | 2.0                                                | 17.4                                               | 1.6                                           | 3.1                                      | 0.1                                       | 30.9                                    | -0.2                                | -0.1                           | -42.8            | 0.5                                                    | -0.8                                              | 2.6                                    |
|                            | Mixture                     | 6.0                                       | 8.8                              | 9.7                                   | 4.5                                       | 8.8                                                | 37.7                                               | 10.8                                          | 17.2                                     | 4.7                                       | 171.9                                   | 4.0                                 | 12.2                           | -37.6            | 9.3                                                    | 8.9                                               | 7.5                                    |

Figure S1: Environmental potentials for the 7 recycling options when compared to replacing biomass in cement kilns.

Figure S1 shows the environmental potential of PUR rigid foam recycling when the utilization of PUR rigid foam in cement kilns is considered as the benchmark and miscanthus is replaced instead of lignite.

In this case, PUR rigid foam recycling has positive environmental potentials for almost all impact categories. Compared to the replacement of lignite, all chemical recycling options have positive environmental potentials in the impact category “eutrophication - freshwater”. However, now, a negative potential is identified in the impact category "land use" for all recycling options: as cultivating miscanthus to replace the PUR rigid foam causes high environmental impacts in “land use”, any potential credits from the avoided production of the chemical recycling products are smaller than those cultivation impacts.

Additionally, for the recycling to benzene (option 6), burden shifting occurs for the impact categories “human toxicity - carcinogenic”, “eutrophication – marine”, “ecotoxicity - freshwater” and “material resources – metals/minerals” due to low credits for benzene and high emissions from residual waste treatment, as discussed in the Section 3.1 in the main manuscript.

## S6 Calculating the minimum conversion rate

The environmental potential depends on the conversion rate (CR) of the recycling process. A decrease in the conversion rate results in a lower mass of recycling products and hence a higher mass of residuals (see mass balances in Section S3), i.e.,  $m_{\text{total,RecyclingProduct}}(\text{CR})$  as well as  $m_{\text{total,Residuals}}(\text{CR})$ .

If the environmental potential for a conversion rate of 100% is positive, a decrease of the conversion rate will decrease this environmental potential. The minimal conversion rate (MCR) is defined as the conversion rate where the environmental potential reaches a value of 0.

$$0 = E_{\text{Pot}}(\text{MCR})$$

$$0 = EI_{\text{WT,net}} - EI_{\text{CR,ideal,net}}(\text{MCR})$$

$$0 = EI_{\text{WT,net}} - \left( EI_{\text{CR,ideal,direct}}(m_{\text{total,Residuals}}(\text{MCR})) - EI_{\text{avC}}(m_{\text{total,RecyclingProduct}}(\text{MCR})) \right)$$



## S7 Changes in heating value of residuals wastes due to lower conversion rates

The amount of energy recovered from the residual waste incineration depends on the mass and the heating value of the residuals waste.

Heating values of the residuals wastes with varying compositions are calculated using the equation of Boie<sup>4</sup>:

$$\text{LHV} = 34.8 \frac{\text{MJ}}{\text{kg}} * \frac{m_{\text{C}}}{m_{\text{total}}} + 93.9 \frac{\text{MJ}}{\text{kg}} * \frac{m_{\text{H}}}{m_{\text{total}}} + 6.3 \frac{\text{MJ}}{\text{kg}} * \frac{m_{\text{N}}}{m_{\text{total}}} - 10.8 \frac{\text{MJ}}{\text{kg}} * \frac{m_{\text{O}}}{m_{\text{total}}}$$

As shown in Section S3, the mass and elemental composition of the residuals waste is determined by the recycling products produced. If the mass of products decreases due to lower conversion rates, the mass of the residual waste increases and the composition changes.

## References

- 1 World Intellectual Property Organization, WO2022253873A1, 2022.
- 2 G. Wernet, C. Bauer, B. Steubing, J. Reinhard, E. Moreno-Ruiz and B. Weidema, *Int J Life Cycle Assess*, 2016, **21**, 1218–1230.
- 3 L. Stellner, A. Kätelhön, O. Vögler, R. Hermanns, S. Sangwon, A. Bardow and R. Meys, *Methodology cm.chemicals Version 1.01*, Carbon Minds GmbH, Cologne, 2022.
- 4 E. Doering, H. Schedwill and M. Dehli, *Grundlagen der Technischen Thermodynamik*, Springer Fachmedien, Wiesbaden, 2016.
